# Supplementary material
Source: publisher site journal article supplement (https://www.dovepress.com/article/444847)

**Table S1** Differences in clinical characteristics

| Type | .y. | Group1 | Group2 | n1 | n2 | Statistic | p | p.adj | p.signif |
| --- | --- | --- | --- | --- | --- | --- | --- | --- | --- |
| age | Score | control | disease | 18 | 20 | 204.5 | 0.483 | 0.508 | ns |
| gender | Score | control | disease | 18 | 20 | 200 | 0.508 | 0.508 | ns |

**Fig S1** Expression validation analysis of model DEMGs in different datasets


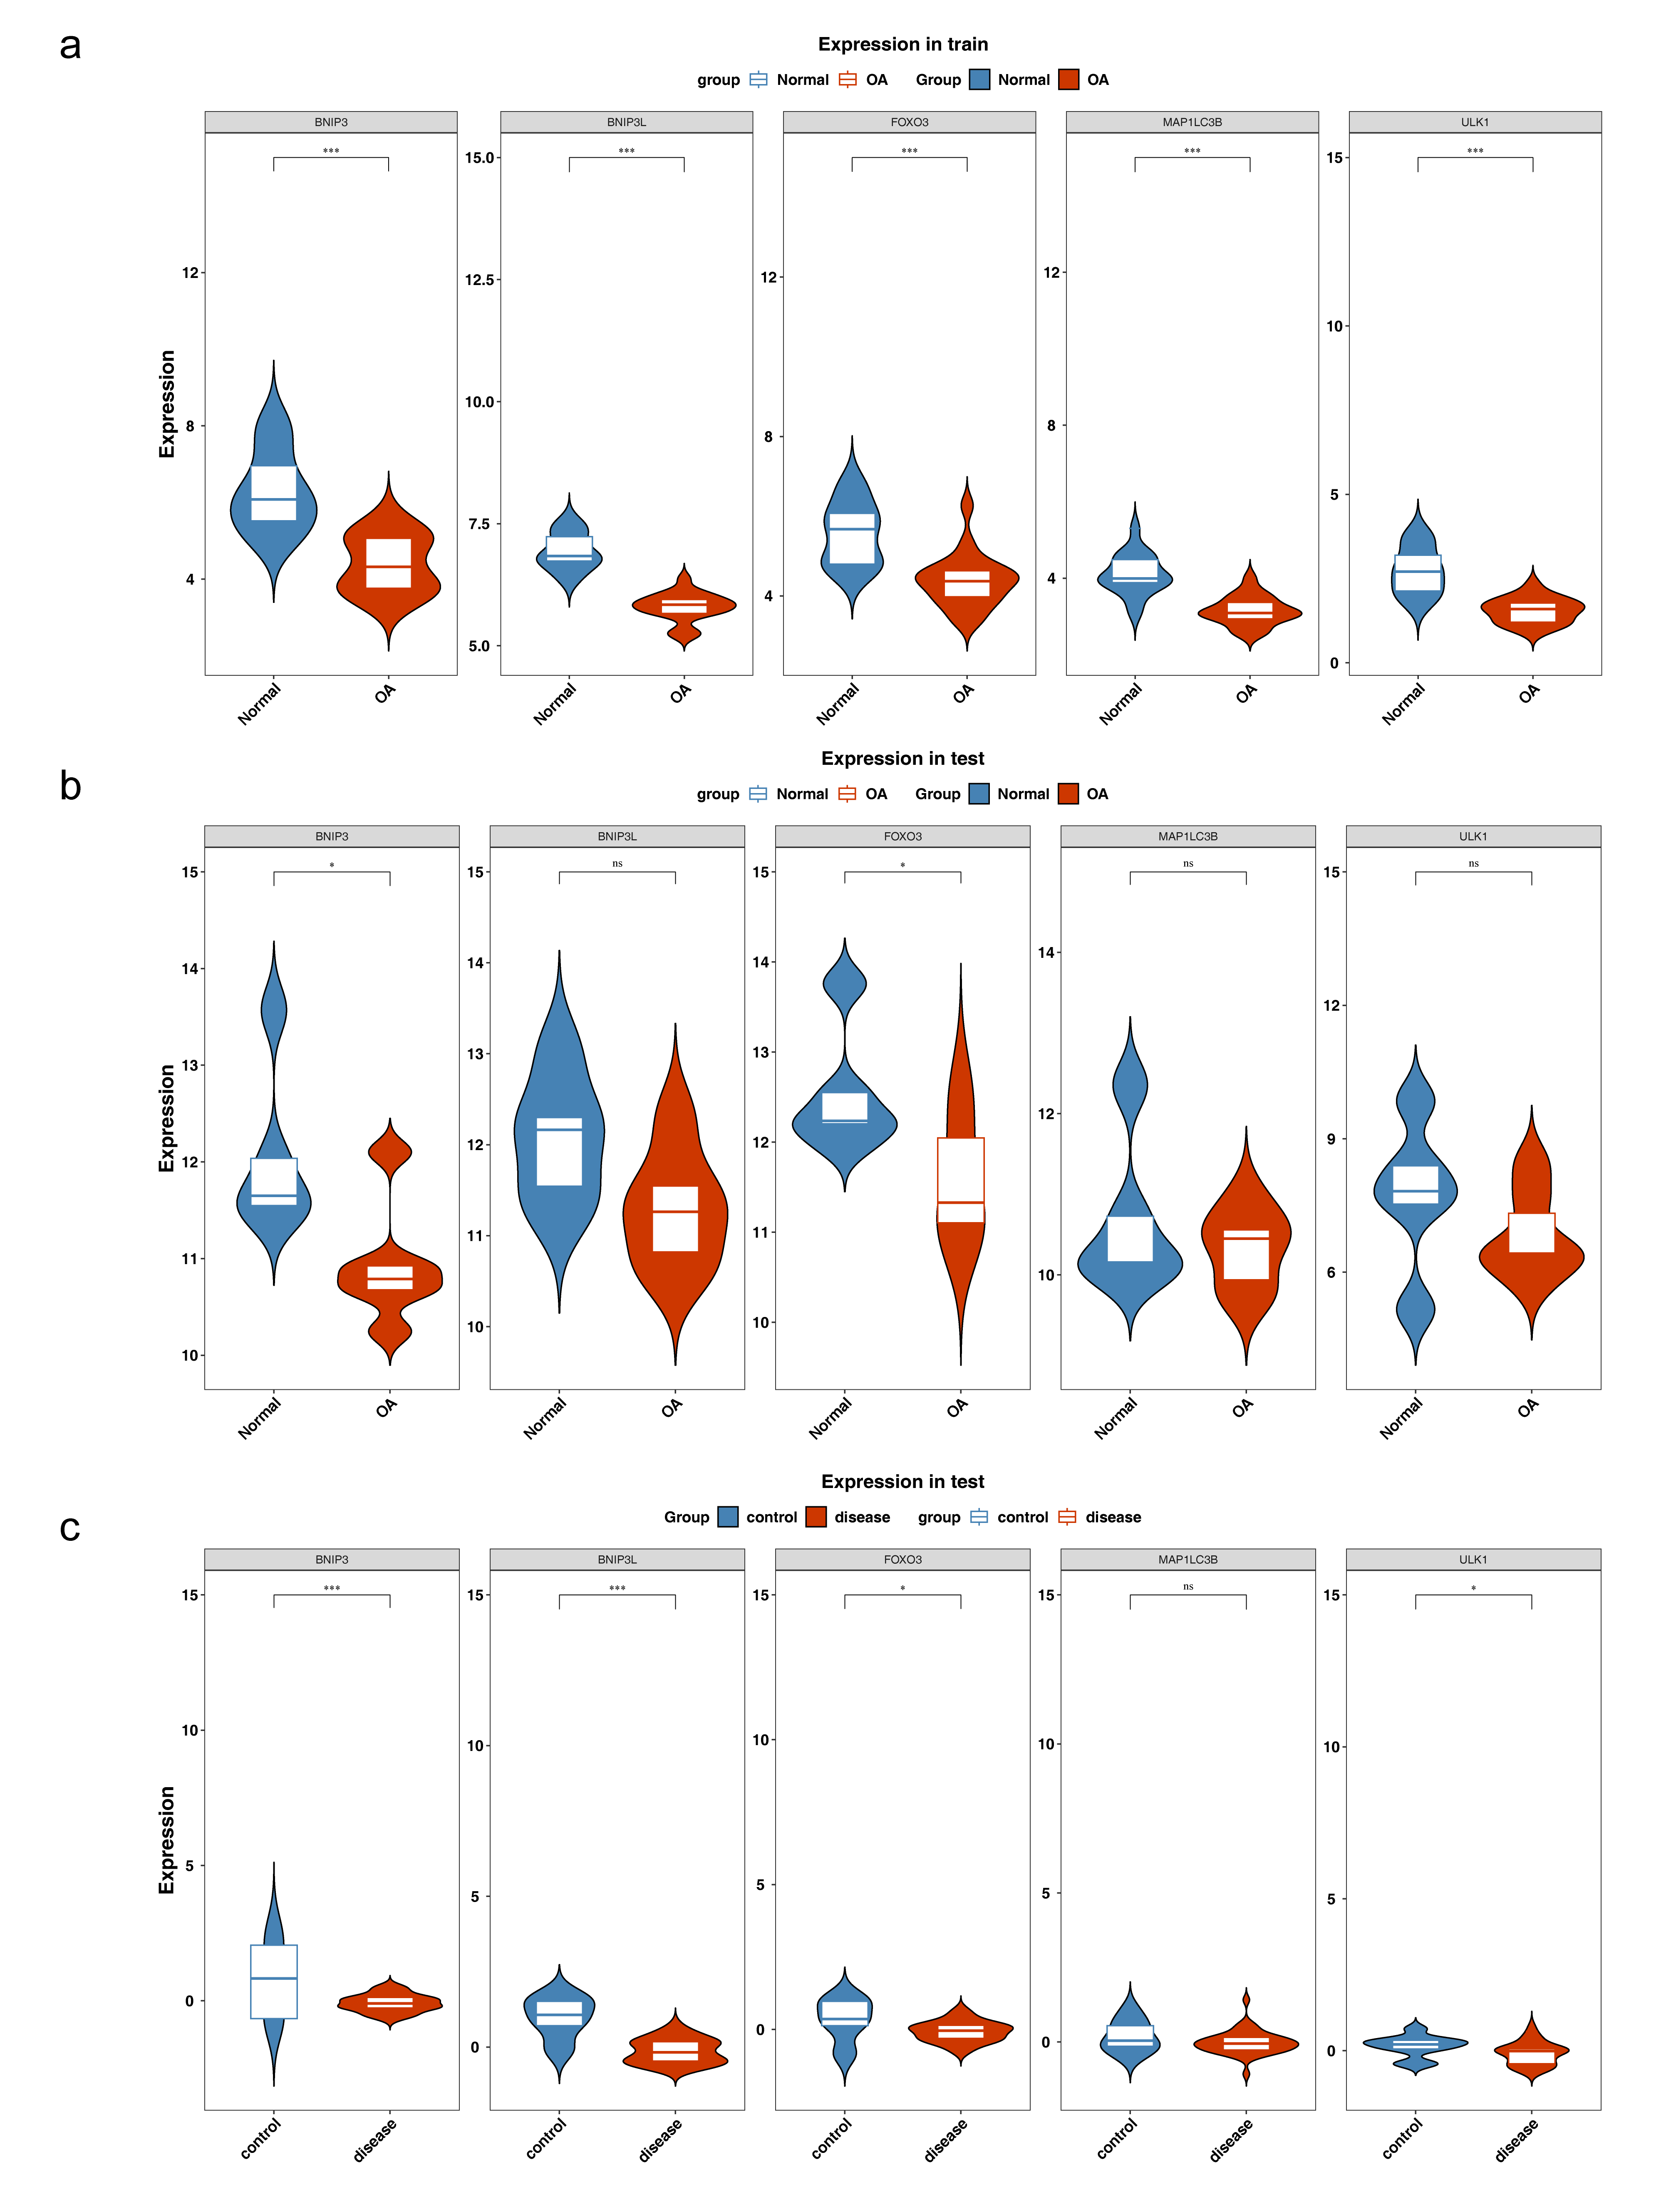

Supplement: Supplementary file 1 [file get_supplementary_file.php]
